# Supplementary material for: Low-dose ethanol increases aflatoxin production due to the adh1-dependent incorporation of ethanol into aflatoxin biosynthesis
Source: PubMed Central journal article supplement (PMC9932502; doi:10.1016/j.isci.2023.106051), 2023-01-23
Supplement: mmc1.pdf [file mmc1.pdf]

**Supplemental information**

**Low-dose ethanol increases aflatoxin production  
due to the *adh1*-dependent incorporation  
of ethanol into aflatoxin biosynthesis**

**Tomohiro Furukawa, Masayo Kushiro, Hiroyuki Nakagawa, Hirofumi  
Enomoto, and Shohei Sakuda**

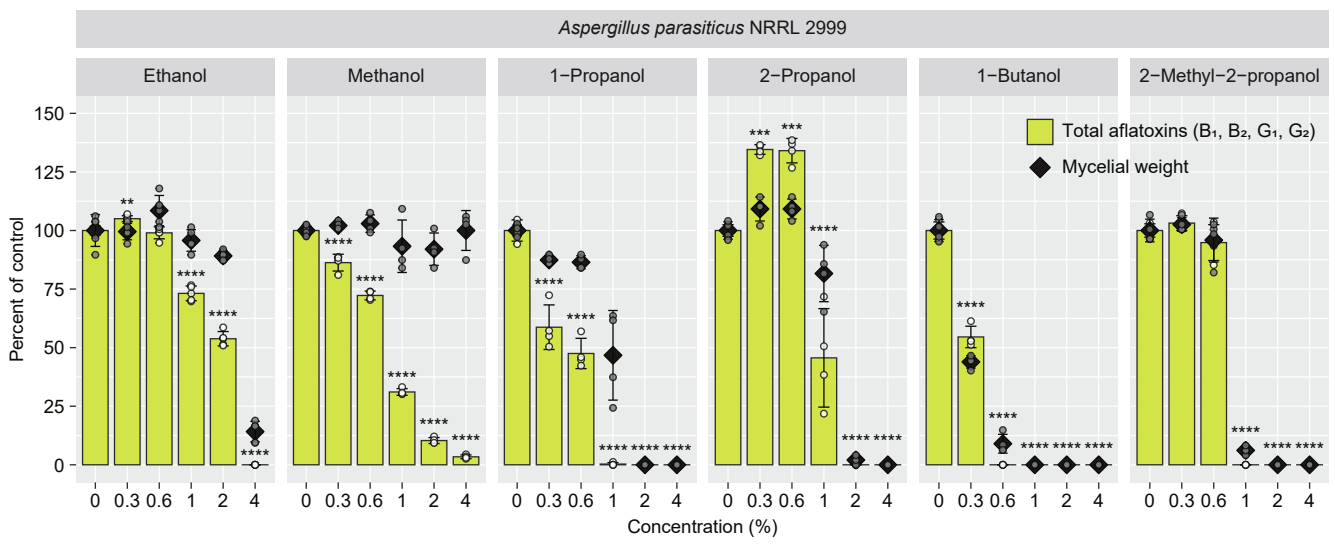

**Figure S1** Effects of low-molecular-weight alcohols on the aflatoxins production and mycelial weight of *Aspergillus parasiticus* NRRL2999. Related to Figure 1. Mean  $\pm$  SD,  $n = 5$  (ethanol) or 4 (other alcohols), ANOVA followed by Dunnett's test. \*\* $p < 0.01$ , \*\*\* $p < 0.001$ , \*\*\*\* $p < 0.0001$ , vs. control.

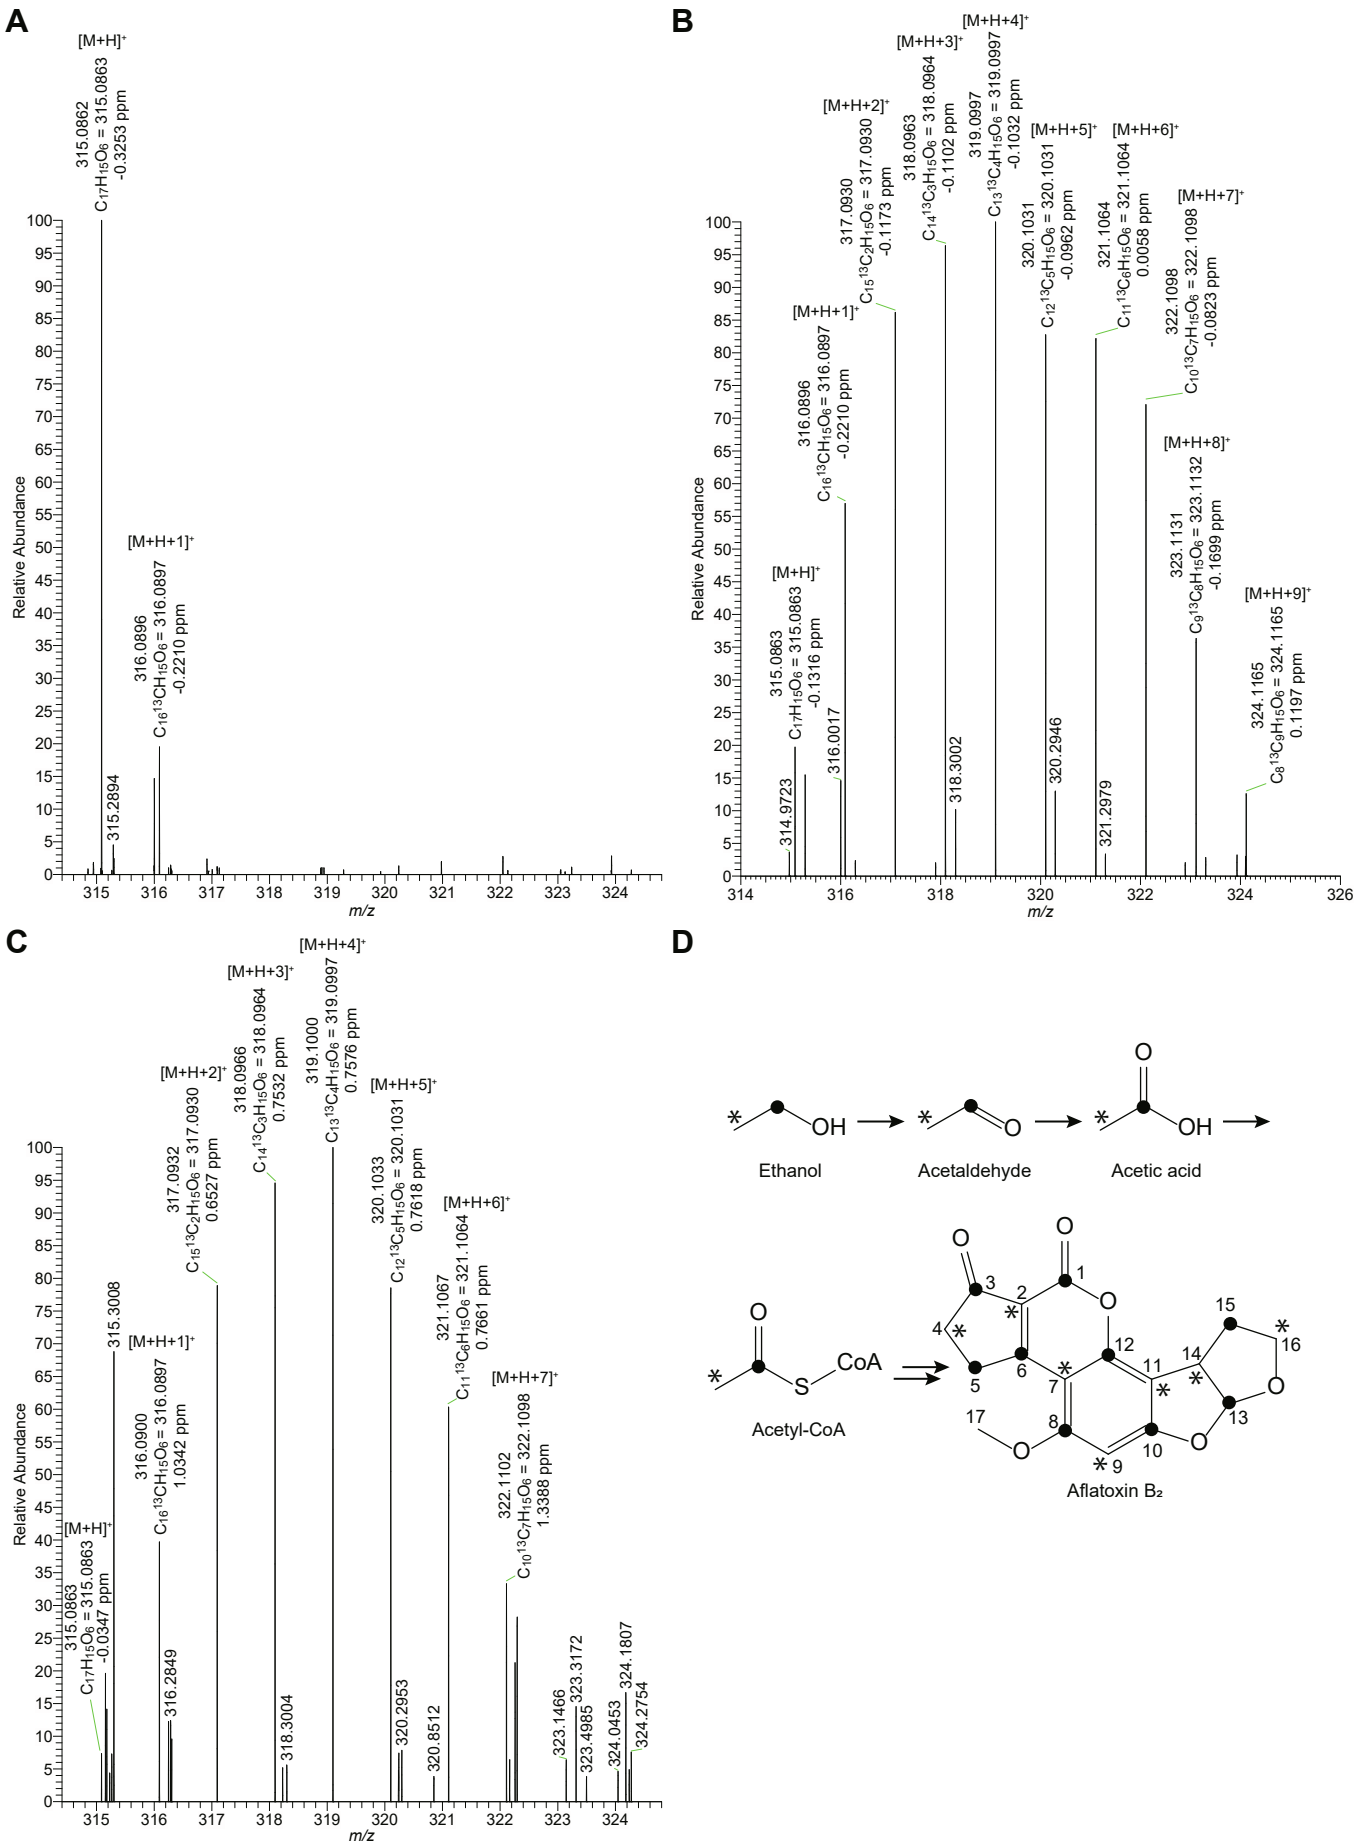

**Figure S2**  $^{13}\text{C}$  of  $[1\text{-}^{13}\text{C}]$ -ethanol and  $[2\text{-}^{13}\text{C}]$ -ethanol were also incorporation into aflatoxin B<sub>2</sub>. Related to Figure 2.

(A–C) Mass spectra of aflatoxin B<sub>2</sub> extracted from control culture (A) and cultures supplemented with 1% of  $[1\text{-}^{13}\text{C}]$ - and  $[2\text{-}^{13}\text{C}]$ -ethanol, respectively (B and C). The observed mass, predicted molecular formula, and mass accuracy between theoretical and observed  $m/z$  are shown above each peak.

(D) Predicted pathway of  $^{13}\text{C}$  incorporation from labeled ethanol to aflatoxin B<sub>2</sub>.

• and \* indicate  $^{13}\text{C}$  derived from  $^{13}\text{C}$  of  $[1\text{-}^{13}\text{C}]$ - and  $[2\text{-}^{13}\text{C}]$ -ethanol, respectively.

**A**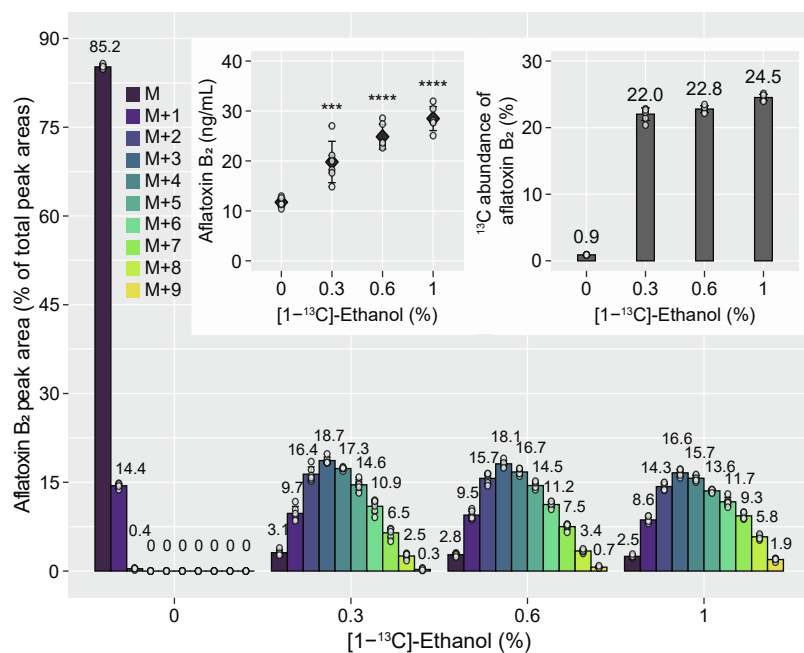**B**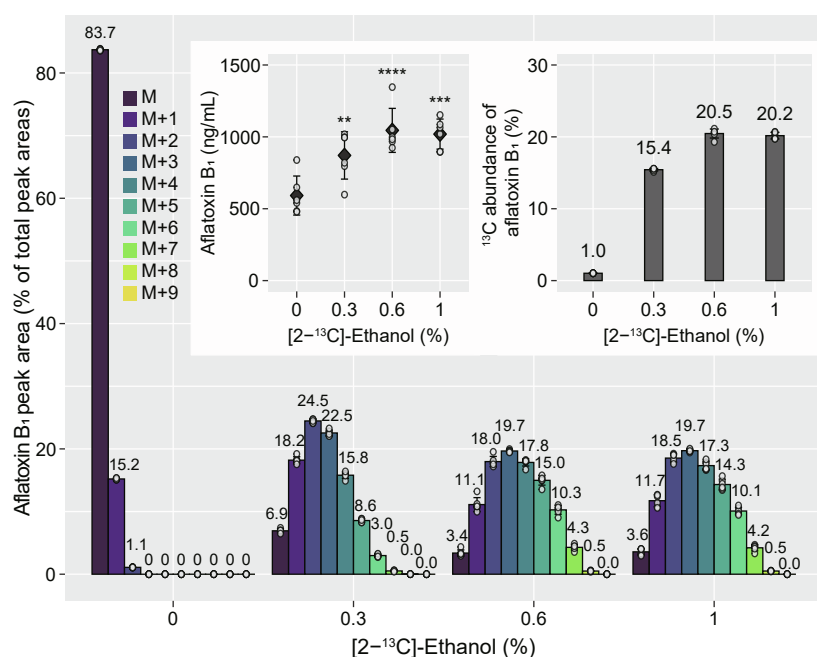**C**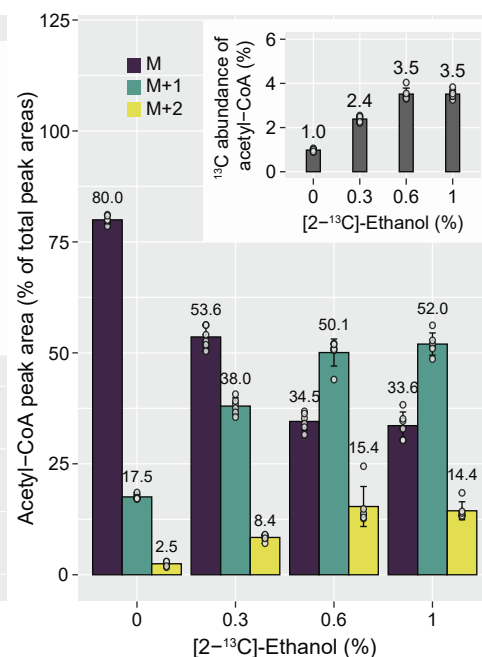**D**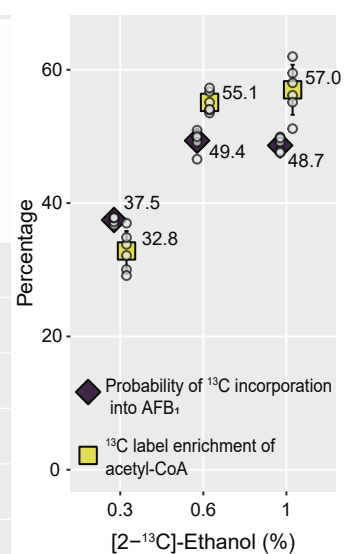

**Figure S3** <sup>13</sup>C incorporation into aflatoxin B<sub>1</sub>, aflatoxin B<sub>2</sub>, and acetyl-CoA when labeled ethanol was added. Related to Figure 3.

(A) Percentages of peak areas of aflatoxin B<sub>2</sub> produced by *A. flavus* cultured with [1-<sup>13</sup>C]-ethanol; aflatoxin B<sub>2</sub> concentrations and <sup>13</sup>C abundance are shown in the inset panels. Mean ± SD, *n* = 6. \*\*\**p* < 0.001, \*\*\*\**p* < 0.0001 vs. control, ANOVA followed by Dunnett's test.

(B) Percentages of peak areas of aflatoxin B<sub>1</sub> produced by *A. flavus* cultured with [2-<sup>13</sup>C]-ethanol; aflatoxin B<sub>1</sub> concentrations and <sup>13</sup>C abundance are shown in the inset panels. Mean ± SD, *n* = 6. \*\**p* < 0.01, \*\*\**p* < 0.001, \*\*\*\**p* < 0.0001 vs. control, ANOVA followed by Dunnett's test.

(C) Percentages of peak areas of acetyl-CoA extracted from *A. flavus* cultured with [2-<sup>13</sup>C]-ethanol; <sup>13</sup>C abundance shown in the inset panel. Mean ± SD, *n* = 6.

(D) Probability of <sup>13</sup>C incorporation into aflatoxin B<sub>1</sub> and <sup>13</sup>C label enrichment of acetyl-CoA, estimated by binomial regression and expressed as mole per excess percent excess (MPE), respectively. Mean ± SD, *n* = 6.

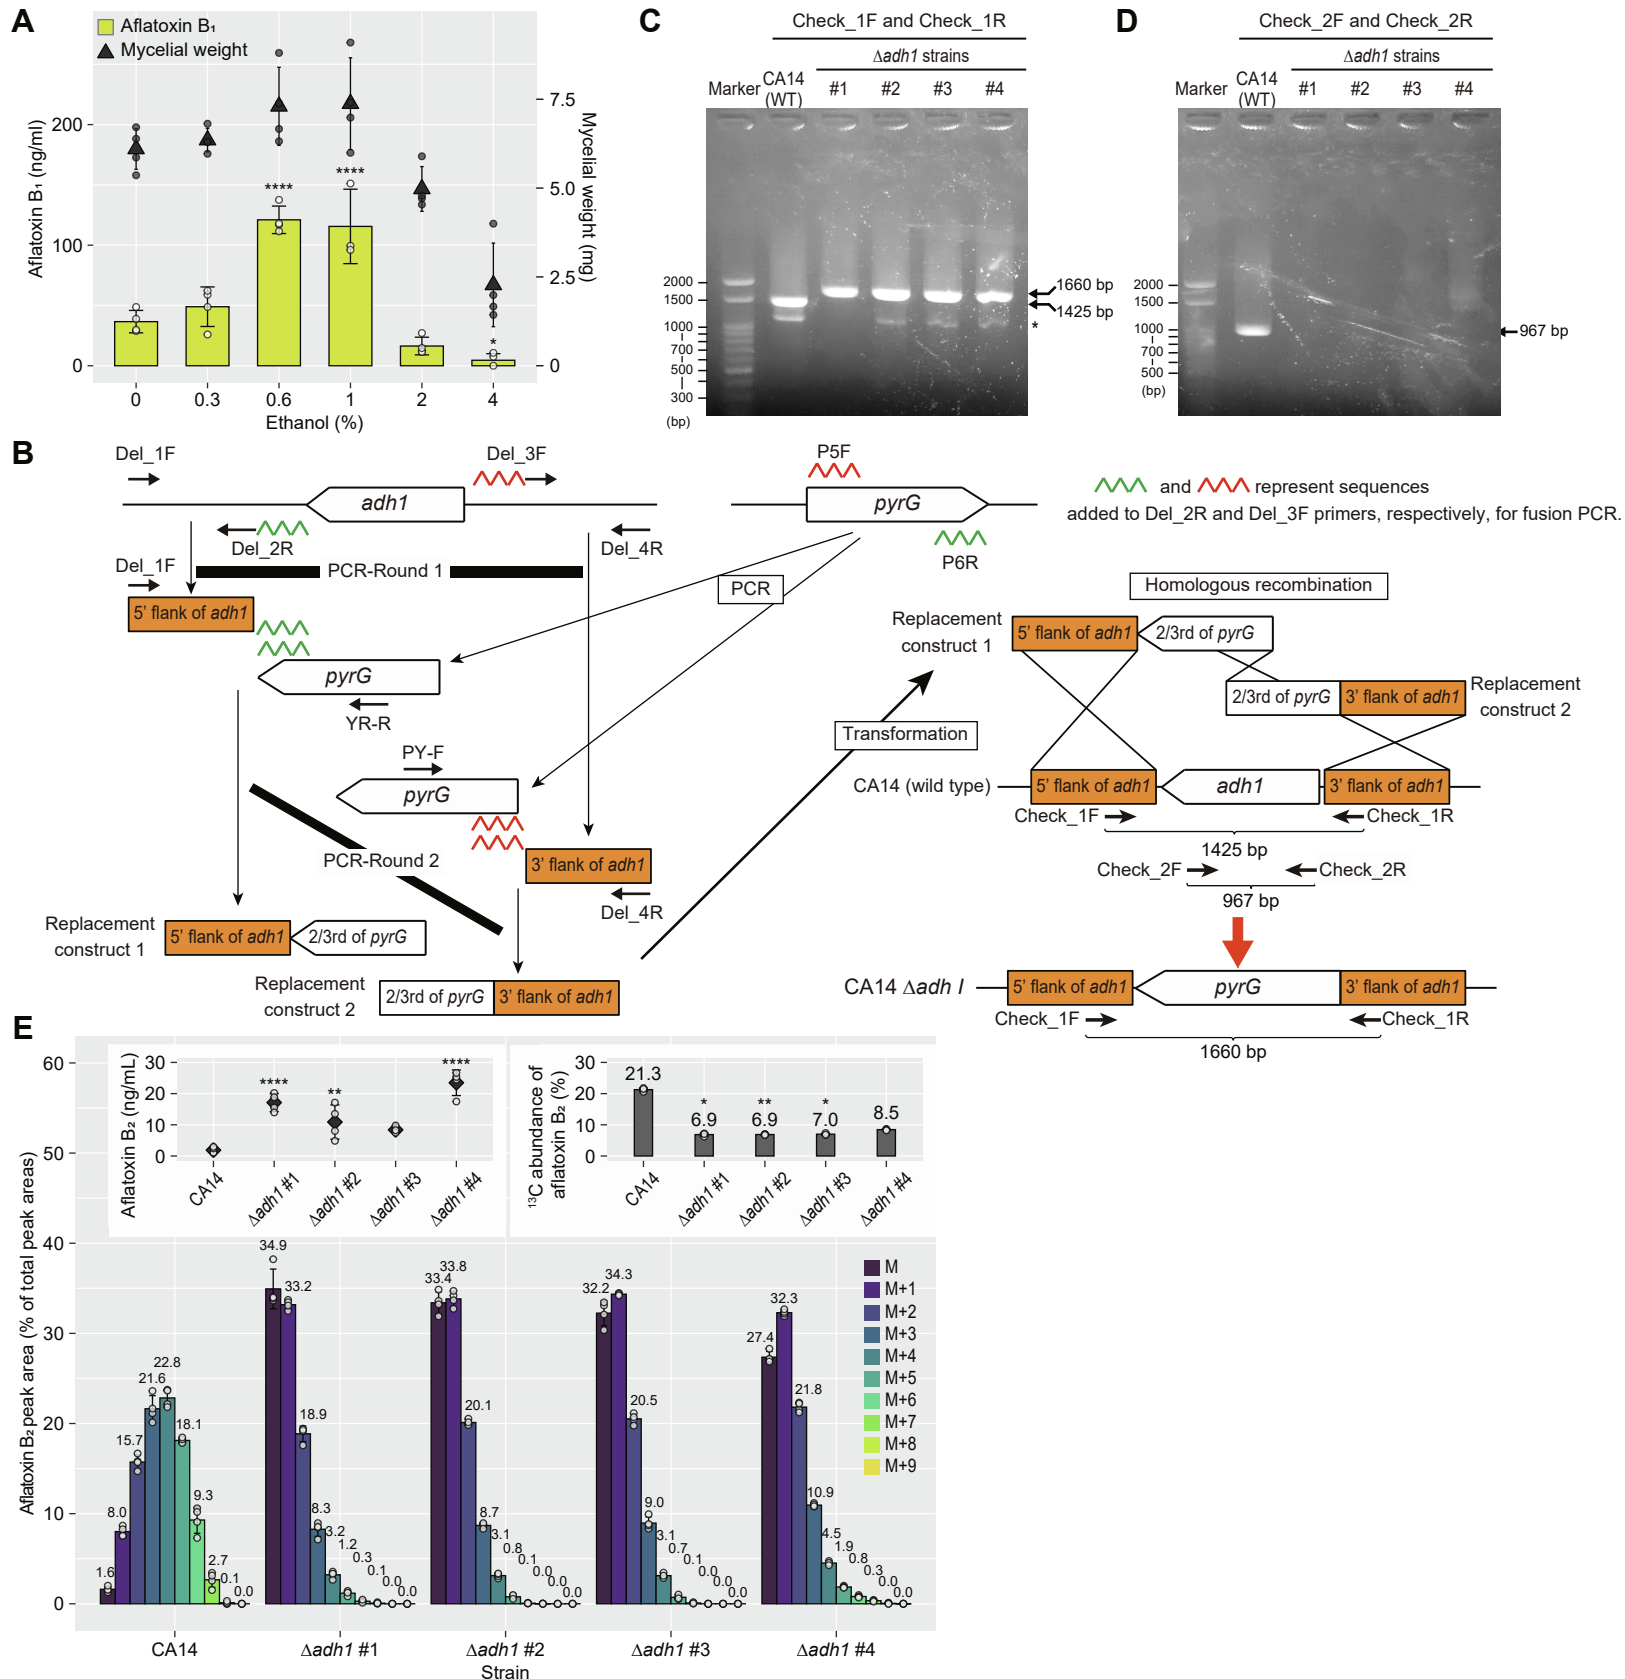

**Figure S4** Preparation of deletion mutants of alcohol dehydrogenase gene *adh1* in CA14 strain. Related to Figure 4.

(A) Effects of ethanol on aflatoxin B<sub>1</sub> production and mycelial weight of *A. flavus* CA14.

Mean ± SD,  $n = 4$ . \* $p < 0.05$ , \*\*\*\* $p < 0.0001$ , vs. control, ANOVA followed by Dunnett's test.

(B) Schematic diagram of preparation of *adh1* gene deletion mutant. Orotidine-5' -monophosphate decarboxylase gene (*pyrG*) was used as the selective marker of deletion candidates, based on the uridine-dependent auxotroph of CA14 strain.

Locations of the primers are represented by black arrows. The sequences of primers are listed in Table S4.

(C and D) PCR verification of *adh1* gene deletion. Genomic DNAs extracted from CA14 and  $\Delta adh1$  candidate strains were subjected to PCR using indicated primers. Asterisk represents non-specific PCR products.

(E) Percentages of peak areas of aflatoxin B<sub>2</sub> produced by  $\Delta adh1$  strains supplemented with [1-<sup>13</sup>C]-ethanol; aflatoxin B<sub>2</sub> concentrations and <sup>13</sup>C abundance are shown in the inset panels. Mean ± SD,  $n = 4$ . \* $p < 0.05$ , \*\* $p < 0.01$ , \*\*\*\* $p < 0.0001$  vs. CA14, ANOVA followed by Dunnett's test (aflatoxin B<sub>2</sub> concentration) or Kruskal–Wallis test followed by Dunn' s test (<sup>13</sup>C abundance).

**A**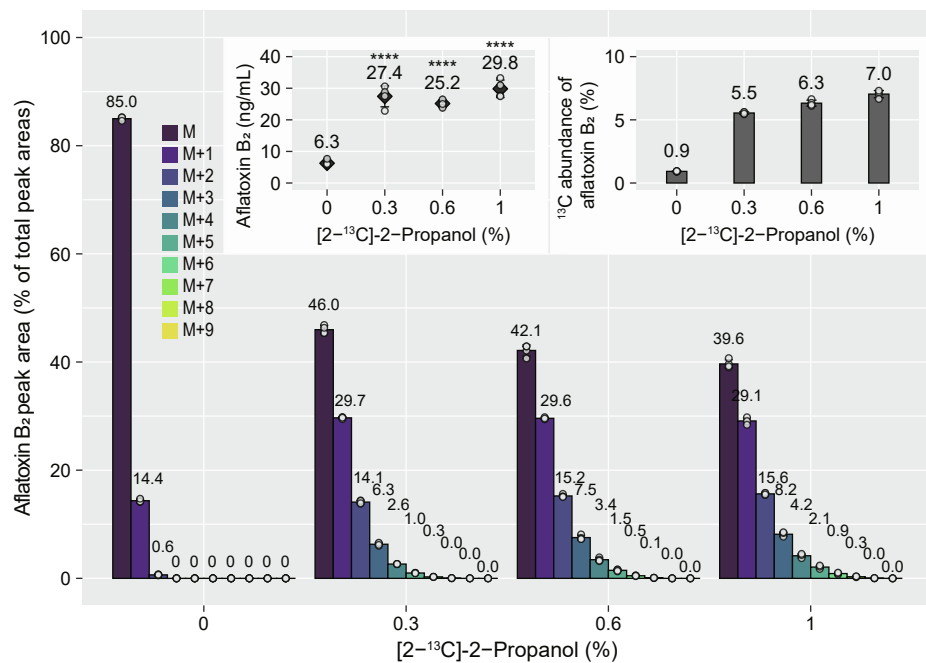**B**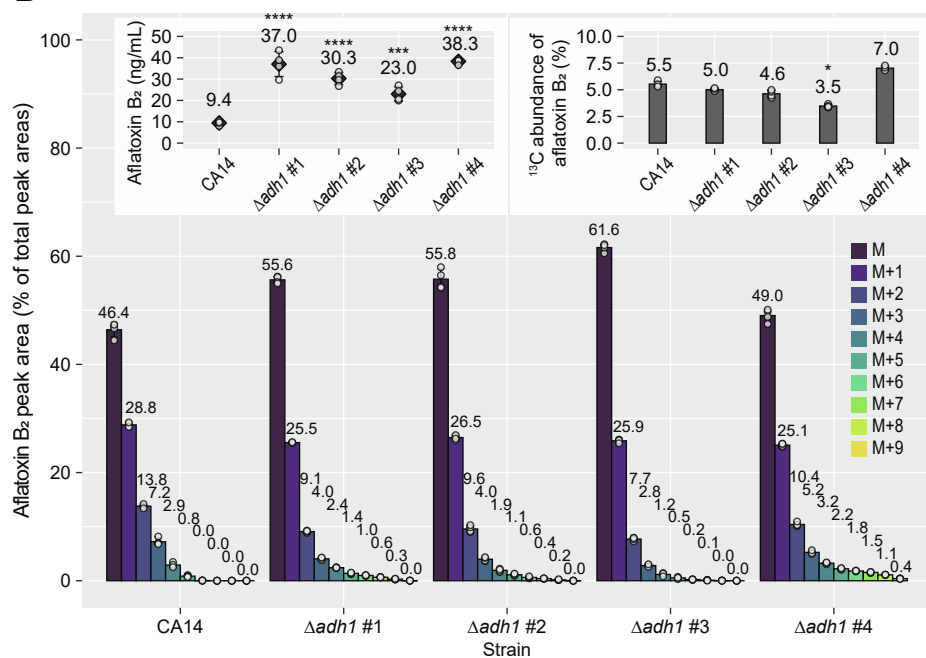

**Figure S5** <sup>13</sup>C of [2-<sup>13</sup>C]-2-Propanol was also incorporation into aflatoxin B<sub>2</sub>. Related to Figure 5.

(A) Percentages of peak areas of aflatoxin B<sub>2</sub> produced by *A. flavus* cultured with [2-<sup>13</sup>C]-2-propanol; aflatoxin B<sub>2</sub> concentrations and <sup>13</sup>C abundance are shown in the inset panels. Mean  $\pm$  SD,  $n = 6$  (control group) and 4 ([2-<sup>13</sup>C]-2-propanol treated groups). \*\*\*\* $p < 0.0001$  vs. control, ANOVA followed by Dunnett's test.

(B) Percentages of peak areas of aflatoxin B<sub>2</sub> collected from the cultures of  $\Delta adh1$  strains with 0.3% [2-<sup>13</sup>C]-2-propanol; aflatoxin B<sub>2</sub> concentrations and <sup>13</sup>C abundance are shown in the inset panels. Mean  $\pm$  SD,  $n = 4$ . \* $p < 0.05$ , \*\*\* $p < 0.001$ , \*\*\*\* $p < 0.0001$  vs. CA14, ANOVA followed by Dunnett's test (aflatoxin B<sub>2</sub> concentrations) or Kruskal–Wallis test followed by Dunn's test (<sup>13</sup>C abundance).

Table S1. Estimation of <sup>13</sup>C incorporation into aflatoxin B<sub>1</sub> from [1-<sup>13</sup>C]-ethanol, Related to Figure 2.

| Observed <i>m/z</i>                                              | 313.070886                                     | 314.073687                                                                  | 315.077562                                                                  | 316.080631                                                                  | 317.084683                                                                  | 318.086868                                                                  | 319.089989                                                                  | 320.094021                                                                  | 321.09701                                                                  | 322.100844                                                                 | 323.103549                                                                  |
|------------------------------------------------------------------|------------------------------------------------|-----------------------------------------------------------------------------|-----------------------------------------------------------------------------|-----------------------------------------------------------------------------|-----------------------------------------------------------------------------|-----------------------------------------------------------------------------|-----------------------------------------------------------------------------|-----------------------------------------------------------------------------|----------------------------------------------------------------------------|----------------------------------------------------------------------------|-----------------------------------------------------------------------------|
| Formula                                                          | C <sub>17</sub> H <sub>13</sub> O <sub>6</sub> | C <sub>16</sub> <sup>13</sup> C <sub>1</sub> H <sub>13</sub> O <sub>6</sub> | C <sub>15</sub> <sup>13</sup> C <sub>2</sub> H <sub>13</sub> O <sub>6</sub> | C <sub>14</sub> <sup>13</sup> C <sub>3</sub> H <sub>13</sub> O <sub>6</sub> | C <sub>13</sub> <sup>13</sup> C <sub>4</sub> H <sub>13</sub> O <sub>6</sub> | C <sub>12</sub> <sup>13</sup> C <sub>5</sub> H <sub>13</sub> O <sub>6</sub> | C <sub>11</sub> <sup>13</sup> C <sub>6</sub> H <sub>13</sub> O <sub>6</sub> | C <sub>10</sub> <sup>13</sup> C <sub>7</sub> H <sub>13</sub> O <sub>6</sub> | C <sub>9</sub> <sup>13</sup> C <sub>8</sub> H <sub>13</sub> O <sub>6</sub> | C <sub>8</sub> <sup>13</sup> C <sub>9</sub> H <sub>13</sub> O <sub>6</sub> | C <sub>7</sub> <sup>13</sup> C <sub>10</sub> H <sub>13</sub> O <sub>6</sub> |
| Label                                                            | [M+H] <sup>+</sup>                             | [M+H+1] <sup>+</sup>                                                        | [M+H+2] <sup>+</sup>                                                        | [M+H+3] <sup>+</sup>                                                        | [M+H+4] <sup>+</sup>                                                        | [M+H+5] <sup>+</sup>                                                        | [M+H+6] <sup>+</sup>                                                        | [M+H+7] <sup>+</sup>                                                        | [M+H+8] <sup>+</sup>                                                       | [M+H+9] <sup>+</sup>                                                       | [M+H+10] <sup>+</sup>                                                       |
| Observed intensity                                               | 51953.23                                       | 151173.13                                                                   | 238743.33                                                                   | 262597.41                                                                   | 194023.50                                                                   | 176273.23                                                                   | 137345.19                                                                   | 102922.27                                                                   | 65428.24                                                                   | 21940.20                                                                   | 1164.91                                                                     |
| Relative abundance                                               | 19.78                                          | 57.57                                                                       | 90.92                                                                       | 100.00                                                                      | 73.89                                                                       | 67.13                                                                       | 52.30                                                                       | 39.19                                                                       | 24.92                                                                      | 8.36                                                                       | 0.44                                                                        |
| Contribution to the [M+H+10] <sup>+</sup> abundance <sup>a</sup> | 0.00                                           | 0.00                                                                        | 0.00                                                                        | 0.00                                                                        | 0.00                                                                        | 0.00                                                                        | 0.00                                                                        | 0.01                                                                        | 0.11                                                                       | 0.74                                                                       | 0.86 <sup>b</sup>                                                           |
| Contribution to the [M+H+9] <sup>+</sup> abundance <sup>c</sup>  | 0.00                                           | 0.00                                                                        | 0.00                                                                        | 0.00                                                                        | 0.00                                                                        | 0.00                                                                        | 0.01                                                                        | 0.22                                                                        | 2.49                                                                       | 2.72 <sup>d</sup>                                                          |                                                                             |

<sup>a</sup>Assuming that [M+H+10]<sup>+</sup> is derived from the natural <sup>13</sup>C contribution, approximate abundance values for the contribution to [M+H+10]<sup>+</sup> from [M+H]<sup>+</sup> to [M+H+9]<sup>+</sup> were calculated. For example, the contribution from [M+H+9]<sup>+</sup> was calculated as follows: as natural <sup>13</sup>C is present at an approximate abundance of 1.1%, the abundance of [M+H+10]<sup>+</sup> (C<sub>7</sub><sup>13</sup>C<sub>10</sub>H<sub>13</sub>O<sub>6</sub>), in which one more <sup>12</sup>C atom of the remaining eight <sup>12</sup>C atoms of [M+H+9]<sup>+</sup> (C<sub>8</sub><sup>13</sup>C<sub>9</sub>H<sub>13</sub>O<sub>6</sub>) is replaced by natural <sup>13</sup>C, is estimated to be  $\frac{\binom{8}{1} * 0.011^1 * 0.989^7}{0.989^8} = 0.089$  when the abundance of [M+H+9]<sup>+</sup> is set to 1. Multiplied by the relative abundance of [M+H+9]<sup>+</sup>, the contribution from [M+H+9]<sup>+</sup> to [M+H+10]<sup>+</sup> is estimated to be  $8.36 \times 0.089 = 0.74$ .

<sup>b</sup>Sum of the contributions from [M+H]<sup>+</sup> to [M+H+9]<sup>+</sup>. The value is comparable to the observed relative abundance, indicating that [M+H+10]<sup>+</sup> can be attributed to the natural <sup>13</sup>C contribution from [M+H]<sup>+</sup> to [M+H+9]<sup>+</sup>.

<sup>c</sup>Assuming that [M+H+9]<sup>+</sup> is derived from the natural <sup>13</sup>C contribution, approximate abundance values for the contribution to [M+H+9]<sup>+</sup> from [M+H]<sup>+</sup> to [M+H+8]<sup>+</sup> were calculated. For example, the contribution from [M+H+7]<sup>+</sup> was calculated as follows: the abundance of [M+H+9]<sup>+</sup>, in which two more <sup>12</sup>C atoms of the 10 <sup>12</sup>C atoms of [M+H+7]<sup>+</sup> (C<sub>10</sub><sup>13</sup>C<sub>7</sub>H<sub>13</sub>O<sub>6</sub>) are replaced by natural <sup>13</sup>C, is estimated to be  $\frac{\binom{10}{2} * 0.011^2 * 0.989^8}{0.989^{10}} = 0.0056$  when [M+H+7]<sup>+</sup> is set to 1. Therefore, the contribution from [M+H+7]<sup>+</sup> to [M+H+9]<sup>+</sup> is calculated to be  $39.19 \times 0.0056 = 0.22$ .

<sup>d</sup>Sum of the contributions from [M+H]<sup>+</sup> to [M+H+8]<sup>+</sup>. The value is much smaller than the observed abundance, indicating that [M+H+9]<sup>+</sup> cannot be explained by the natural <sup>13</sup>C contribution alone, i.e., [M+H+9]<sup>+</sup> was derived from <sup>13</sup>C incorporation from added <sup>13</sup>C.

Table S2. Estimation of  $^{13}\text{C}$  incorporation into aflatoxin B<sub>1</sub> from [2- $^{13}\text{C}$ ]-ethanol, Related to Figure 2.

| Observed $m/z$                                                       | 313.071038                             | 314.073814                                            | 315.077664                                            | 316.080716                                            | 317.083796                                            | 318.087854                                            | 319.090953                                            | 320.094004                                            | 321.097932                                         |
|----------------------------------------------------------------------|----------------------------------------|-------------------------------------------------------|-------------------------------------------------------|-------------------------------------------------------|-------------------------------------------------------|-------------------------------------------------------|-------------------------------------------------------|-------------------------------------------------------|----------------------------------------------------|
| Formula                                                              | $\text{C}_{17}\text{H}_{13}\text{O}_6$ | $\text{C}_{16}^{13}\text{C}_1\text{H}_{13}\text{O}_6$ | $\text{C}_{15}^{13}\text{C}_2\text{H}_{13}\text{O}_6$ | $\text{C}_{14}^{13}\text{C}_3\text{H}_{13}\text{O}_6$ | $\text{C}_{13}^{13}\text{C}_4\text{H}_{13}\text{O}_6$ | $\text{C}_{12}^{13}\text{C}_5\text{H}_{13}\text{O}_6$ | $\text{C}_{11}^{13}\text{C}_6\text{H}_{13}\text{O}_6$ | $\text{C}_{10}^{13}\text{C}_7\text{H}_{13}\text{O}_6$ | $\text{C}_9^{13}\text{C}_8\text{H}_{13}\text{O}_6$ |
| Label                                                                | $[\text{M}+\text{H}]^+$                | $[\text{M}+\text{H}+1]^+$                             | $[\text{M}+\text{H}+2]^+$                             | $[\text{M}+\text{H}+3]^+$                             | $[\text{M}+\text{H}+4]^+$                             | $[\text{M}+\text{H}+5]^+$                             | $[\text{M}+\text{H}+6]^+$                             | $[\text{M}+\text{H}+7]^+$                             | $[\text{M}+\text{H}+8]^+$                          |
| Observed intensity                                                   | 56696.72266                            | 138612.5625                                           | 189037.8125                                           | 171276                                                | 122706.5234                                           | 67372.64844                                           | 27864.01172                                           | 7313.080078                                           | 783.017761                                         |
| Relative abundance                                                   | 29.99                                  | 73.33                                                 | 100.00                                                | 90.60                                                 | 64.91                                                 | 35.64                                                 | 14.74                                                 | 3.87                                                  | 0.41                                               |
| Contribution to the $[\text{M}+\text{H}+8]^+$ abundance <sup>a</sup> | 0.00                                   | 0.00                                                  | 0.00                                                  | 0.00                                                  | 0.00                                                  | 0.01                                                  | 0.10                                                  | 0.43                                                  | 0.54 <sup>b</sup>                                  |
| Contribution to the $[\text{M}+\text{H}+7]^+$ abundance <sup>c</sup> | 0.00                                   | 0.00                                                  | 0.00                                                  | 0.00                                                  | 0.03                                                  | 0.29                                                  | 1.80                                                  | 2.12 <sup>d</sup>                                     |                                                    |

<sup>a</sup>Assuming that  $[\text{M}+\text{H}+8]^+$  is derived from the natural  $^{13}\text{C}$  contribution, approximate abundance values for the contribution to  $[\text{M}+\text{H}+8]^+$  from  $[\text{M}+\text{H}]^+$  to  $[\text{M}+\text{H}+9]^+$  were calculated.

<sup>b</sup>Sum of the contributions from  $[\text{M}+\text{H}]^+$  to  $[\text{M}+\text{H}+7]^+$ . The value is comparable to the observed relative abundance, indicating that  $[\text{M}+\text{H}+8]^+$  can be attributed to the natural  $^{13}\text{C}$  contribution from  $[\text{M}+\text{H}]^+$  to  $[\text{M}+\text{H}+7]^+$ .

<sup>c</sup>Assuming that  $[\text{M}+\text{H}+7]^+$  is derived from the natural  $^{13}\text{C}$  contribution, approximate abundance values for the contribution to  $[\text{M}+\text{H}+7]^+$  from  $[\text{M}+\text{H}]^+$  to  $[\text{M}+\text{H}+6]^+$  were calculated.

<sup>d</sup>Sum of the contributions from  $[\text{M}+\text{H}]^+$  to  $[\text{M}+\text{H}+6]^+$ . The value is much smaller than the observed abundance, indicating that  $[\text{M}+\text{H}+7]^+$  cannot be explained by the natural  $^{13}\text{C}$  contribution alone, i.e.,  $[\text{M}+\text{H}+7]^+$  was derived from  $^{13}\text{C}$  incorporation from added  $^{13}\text{C}$ .



Table S3. Primers used for RT-qPCR, Related to STAR Methods.

| Biological process                           | Gene (Yeast) | Protein (Yeast)                         | Identity (%) | Similarity (%) | EnsemblFungi ID ( <i>A. flavus</i> ) | EnsemblFungi Description ( <i>A. flavus</i> )             | Primer pair (5'→3')     |                           |
|----------------------------------------------|--------------|-----------------------------------------|--------------|----------------|--------------------------------------|-----------------------------------------------------------|-------------------------|---------------------------|
| Ethanol biosynthetic process                 | ADH1         | Alcohol dehydrogenase 1                 | 57           | 88             | AFLA_048690                          | alcohol dehydrogenase, putative                           | CAAGCCATGTGCGAGCAACT    | TAGCGGCTTTGACATCTGCAA     |
|                                              |              |                                         | 33           | 73             | AFLA_010360                          | quinone oxidoreductase, putative                          | GGCGATTGGGTGGTGATT      | CCTTTATCCGAGCAGCAATCTG    |
|                                              |              |                                         | 44           | 74             | AFLA_024290                          | alcohol dehydrogenase, putative                           | ACGCGAGGCGAGTCAAAGAGA   | AGGATCGGACGTTTCGATGA      |
|                                              |              |                                         | 42           | 72             | AFLA_039390                          | alcohol dehydrogenase, putative                           | ACTCGACCTCCGCCATGATA    | AGAAACCAGTGCATTCCAACCTG   |
|                                              |              |                                         | 42           | 74             | AFLA_073680                          | alcohol dehydrogenase, putative                           | ACGCCAATCTGTGCAGTTC     | GATGGGCTGAGGGTTGTTTTC     |
|                                              |              |                                         | 46           | 78             | AFLA_125860                          | alcohol dehydrogenase, putative                           | CCGCTCGTTTTGGCTTTG      | CGCTTCTCGACATCTCTCAA      |
|                                              |              |                                         | 35           | 74             | AFLA_133830                          | alcohol dehydrogenase, putative                           | GCCACCGCTTTCTTCGATT     | CGAGCCCACCCGTTAGTTT       |
| Ethanol catabolic process                    | ALD1         | Aldehyde dehydrogenase 1, mitochondrial | 38           | 73             | AFLA_108790                          | aldehyde dehydrogenase AldA, putative                     | TGGTGGGCGGATAAGATT      | GTGGCGGGTGTAGGTAAGAGACT   |
| Acetyl-CoA biosynthetic process from acetate | ACSI         | Acetyl-coenzyme A synthetase 1          | 63           | 89             | AFLA_027070                          | acetyl-coenzyme A synthetase FacA                         | CGCAAGTCGATTGGACCATT    | ATCTTACCCTGCGAGTCTTAGG    |
| Malonyl-CoA biosynthetic process             | ACCI         | Acetyl-CoA carboxylase                  | 64           | 89             | AFLA_046360                          | acetyl-CoA carboxylase, putative                          | CACAGGTGCTCCGGCTATTAA   | ATACATAATCTGCGTTCACCAAGT  |
| Acetate metabolic process                    | ACH1         | Acetyl-CoA hydrolase                    | 66           | 89             | AFLA_078380                          | acetyl-coA hydrolase Ach1, putative                       | CACCCCGACTACAAGCCAAT    | TCGTGGCCCATACCCTTCT       |
| Glycolytic fermentation to ethanol           | PDC1         | Pyruvate decarboxylase isozyme 1        | 48           | 83             | AFLA_031570                          | pyruvate decarboxylase PdcA, putative                     | AACCGGCACTGCCAATTTTC    | TACCCCAAGAACCTGACTAATGG   |
| Aflatoxin biosynthetic process               |              |                                         |              |                | AFLA_139380                          | aflA / fas-2 / hexA / fatty acid synthase alpha subunit   | TTGGCCGCTCTCTATTTC      | GGCTTGCTCTCGTCATACTCATAAC |
|                                              |              |                                         |              |                | AFLA_139370                          | aflB / fas-1 / fatty acid synthase beta subunit           | GCATATTGTCGGACTGTGGAAGT | CAAACGAGAACCGTCCCTAAAG    |
|                                              |              |                                         |              |                | AFLA_139410                          | aflC / pksA / pksL1 / polyketide synthase                 | TGCATGGCGATGTGGTAGTT    | GTAAGGCCGCGGAAGAAAG       |
|                                              |              |                                         |              |                | AFLA_139390                          | aflD / nor-1 / reductase                                  | AGTCCAAGCAACAGGCAAGT    | CGCGCATAGTCGTGCATGT       |
|                                              |              |                                         |              |                | AFLA_139310                          | aflE / norA / aad / adh-2 / NOR reductase / dehydrogenase | TATCATCTAGCGCCGGTGTTTC  | CATTACCCCTTCCAGCCATT      |
|                                              |              |                                         |              |                | AFLA_139440                          | aflF / norB / dehydrogenase                               | GCACATTTCACTGATGGATGAAG | CGGAAATCCAGGATCAAACCTCA   |
|                                              |              |                                         |              |                | AFLA_139260                          | aflG / avnA / ord-1 / cytochrome P450 monooxygenase       | GCAACCTTGTCGCGATCT      | ACAGCTCATTGGGTGCGATT      |
|                                              |              |                                         |              |                | AFLA_139330                          | aflH / adhA / short chain alcohol dehydrogenase           | CAGGTAAACTTGATCGGCGTCTA | GATTGGCGGCTTGTTTGT        |
|                                              |              |                                         |              |                | AFLA_139230                          | aflI / avfA / cytochrome P450 monooxygenase               | TCAAATCCTCGTTCGGTCAAA   | CGTGGACTTGTTGGTTCTTG      |

|               |  |  |  |  |              |                                                                     |                           |                        |
|---------------|--|--|--|--|--------------|---------------------------------------------------------------------|---------------------------|------------------------|
|               |  |  |  |  | AFLA_139320  | aflJ/ estA/ esterase                                                | TGAGGAGAATGCGGAGTTGAC     | ACCGGCGCCTTGTAACAAT    |
|               |  |  |  |  | AFLA_139190  | aflK/ vbs/ VERB synthase                                            | CAGATCGGAGCCAAGAAGGA      | CCGATTCCAGACACCATTAGC  |
|               |  |  |  |  | AFLA_139250  | aflL/ verB/ desaturase/ P450<br>monooxygenase                       | CAACAAGCGGATGAAAATGGA     | GCTGATTATCGTCGGCACTCT  |
|               |  |  |  |  | AFLA_139300  | aflM/ ver-1/ dehydrogenase/ ketoreductase                           | TGAGGCAACTGCGAAGTTAATG    | CCAGCGTTCGATGACACGAT   |
|               |  |  |  |  | AFLA_139280  | aflN/ verA/ monooxygenase                                           | CTTTAGCGGGACCTGGATGA      | TGGCCGGTTTGGTTAAATTC   |
|               |  |  |  |  | AFLA_139220  | aflO/ omtB/ dmtA/ O-methyltransferase B                             | AGAGAGCGACACGCCGATAA      | GAAGAATGCGACCAAGGAGTCT |
|               |  |  |  |  | AFLA_139210  | aflP/ omtA/ omt-1/ O-methyltransferase A                            | ACCAAGGAGTGGAATTCGCTTAT   | GCCTTTGCGCCACCATATCT   |
|               |  |  |  |  | AFLA_139200  | aflQ/ ordA/ ord-1/ oxidoreductase/<br>cytochrome P450 monooxygenase | AATCGGGATTCGACGGTTCTT     | CGTTGGCTTCCTTTCGGATAT  |
|               |  |  |  |  | AFLA_139360  | aflR / apa-2 / afl-2 / transcription activator                      | TCCGCCATCTTTTCTCATCA      | CCGAATCCGAATCGACTGTTA  |
|               |  |  |  |  | AFLA_139340  | aflS/ pathway regulator                                             | CGAGTCGCTCAGGCGCTCAA      | GCTCAGACTGACCGCGCTC    |
| Ribosomal RNA |  |  |  |  | G4B84_011247 | 18S ribosomal RNA                                                   | CTCACCAGGTCCAGACAAAATAAGG | GCACCACCATCCAAAAGATCA  |

Table S4. Primers used for preparation of  $\Delta adh1$  strains, Related to STAR Methods.

| Application                                                                 | Primer name | Sequence (5'→3')                           | Notes                                                                                       |
|-----------------------------------------------------------------------------|-------------|--------------------------------------------|---------------------------------------------------------------------------------------------|
| Amplification of 5' flank region and preparation of replacement construct 1 | Del_1F      | GCATGGGACTGAGTCTGGTC                       |                                                                                             |
| Amplification of 5' flank region                                            | Del_2R      | GAGTGTCTGAAGGTGCAGCTTCTCTCCTCAGGGTCTCCG    | The 5' end 20 nucleotides are complementary to P6R primer.                                  |
| Amplification of 3' flank region                                            | Del_3F      | CGGGGATTATGCCTGGCTTTTGACTTTGGGATCTTGTGTTGA | The 5' end 20 nucleotides are complementary to P5F primer.                                  |
| Amplification of 3' flank region and preparation of replacement construct 2 | Del_4R      | AGAAACGGAACTAGCGGCTC                       |                                                                                             |
| Amplification of <i>pyrG</i> gene                                           | P5F         | AAAGCCAGGCATAATCCCCG                       |                                                                                             |
| Amplification of <i>pyrG</i> gene                                           | P6R         | AGCTGCACCTCAGACACTC                        |                                                                                             |
| Preparation of replacement construct 2                                      | PY-F        | ACAGCCGACTCAGGAGTTTG                       |                                                                                             |
| Preparation of replacement construct 1                                      | YR-R        | AACCATCACCGGTCTGAAGG                       |                                                                                             |
| Confirmation of <i>adh1</i> gene replacement                                | Check_1F    | CTAGAAGATGTACCCGCCG                        | Check_1F and Check_1R pair amplifies 5' flanking to 3' flanking region of <i>adh1</i> gene. |
| Confirmation of <i>adh1</i> gene replacement                                | Check_1R    | CGCAACCTCCTTCTTCCCT                        |                                                                                             |
| Confirmation of <i>adh1</i> gene replacement                                | Check_2F    | GGTTACCGACGTAGCTTCCC                       | Check_2F and Check_2R pair amplifies inside <i>adh1</i> gene.                               |
| Confirmation of <i>adh1</i> gene replacement                                | Check_2R    | GAGATGCAGTGGGCTCAAGT                       |                                                                                             |
